# Supplementary material for: Importance of Multifaceted Approaches in Infection Control: A Practical Experience from an Outbreak Investigation
Source: PubMed Central journal article supplement (PMC4913898; doi:10.1371/journal.pone.0157981), 2016-06-20
Supplement: pone.0157981.s001.pdf [file pone.0157981.s001.pdf]

**S1 File. Audit form.** Analysis of nursing procedures, operational management and infection control measures

| Observed item                              | Compliance  |                |                |                |                 | Comments |
|--------------------------------------------|-------------|----------------|----------------|----------------|-----------------|----------|
|                                            | 1<br>(≤20%) | 2 (21-<br>40%) | 3 (41-<br>60%) | 4 (61-<br>80%) | 5 (81-<br>100%) |          |
| <b>Hand hygiene and use of gloves</b>      |             |                |                |                |                 |          |
| hand disinfection                          |             |                |                |                |                 |          |
| use of gloves                              |             |                |                |                |                 |          |
| <b>Isolation of MRSA positive patients</b> |             |                |                |                |                 |          |
| contact precautions                        |             |                |                |                |                 |          |
| <b>Nursing procedures</b>                  |             |                |                |                |                 |          |
| personal hygiene of patients               |             |                |                |                |                 |          |
| bed-side toilet of patients                |             |                |                |                |                 |          |
| linen manipulation                         |             |                |                |                |                 |          |
| respiratory care                           |             |                |                |                |                 |          |
| vascular access care                       |             |                |                |                |                 |          |
| wound care                                 |             |                |                |                |                 |          |
| urinary catheter care                      |             |                |                |                |                 |          |
| <b>Operational management</b>              |             |                |                |                |                 |          |
| nurses and aides management                |             |                |                |                |                 |          |
| use of medical instruments                 |             |                |                |                |                 |          |
| use of equipment, materials                |             |                |                |                |                 |          |
| use of medicines                           |             |                |                |                |                 |          |
| <b>Environmental cleaning</b>              |             |                |                |                |                 |          |
| environmental cleaning                     |             |                |                |                |                 |          |
| environmental disinfection                 |             |                |                |                |                 |          |
