# Supplementary material for: Importance of Multifaceted Approaches in Infection Control: A Practical Experience from an Outbreak Investigation
Source: PubMed Central journal article supplement (PMC4913898; doi:10.1371/journal.pone.0157981), 2016-06-20
Supplement: pone.0157981.s002.pdf [file pone.0157981.s002.pdf]

## **S2 File. Questionnaire.** Analysis of psychological and work-related factors

1. A) How do you rate the compliance with hand hygiene of healthcare workers (HCW) in the ICU?  
Sufficient     Insufficient     Irrelevant   
  
B) Did you observe a trend over the last three months?  
Unchanged     Improved     Worsened     Extremely worsened
2. A) How do you rate the compliance with isolation precautions of HCW with MRSA positive patients?  
Sufficient     Insufficient     Irrelevant   
  
B) Did you observe a trend over the last three months?  
Unchanged     Improved     Worsened     Extremely worsened
3. A) How do you rate the quality of nursing in the ICU?  
Sufficient     Insufficient     Irrelevant   
  
B) Did you observe a trend over the last three months?  
Unchanged     Improved     Worsened     Extremely worsened
4. A) How do you rate your experience on the cooperation between doctors and nurses in the ICU?  
Good     Bad     No reply   
  
B) Did you observe a trend over the last three months?  
Unchanged     Improved     Worsened     Extremely worsened
5. A) How do you rate the working conditions in the ICU in general?  
Good     Bad     No reply   
  
B) Did you observe a trend over the last three months?  
Unchanged     Improved     Worsened     Extremely worsened
6. A) Do you feel support from the leadership related to your work?  
Sufficient     Insufficient   
  
B) Did you observe a trend over the last three months?  
Unchanged     Improved     Worsened     Extremely worsened
7. How do you rate the number of nurses at the ICU?  
Sufficient     Insufficient
8. How do you rate the number of doctors at the ICU?  
Sufficient     Insufficient
9. How do you rate the number of assistants at the ICU?

Sufficient  Insufficient

10. A) How do you rate your experience on the amount of psychological stress among HCW at the ICU?

Adequate  High  Extremely high

B) Did you observe a trend over the last three months?

Unchanged  Decreased  Increased  Extremely increased

11. A) How is your motivation to work?

Good  Bad  Burn out conditions

B) Did you observe a trend over the last three months?

Unchanged  Improved  Worsened  Extremely worsened
